# Supplementary material for: Identifying discriminant factors between phantom limb pain, residual limb pain, and both in people with lower limb amputations: a cross-sectional study
Source: PubMed Central journal article supplement (PMC11424063; doi:10.1097/mrr.0000000000000634), 2024-07-15
Supplement: ijrr-47-214-s001.pdf [file ijrr-47-214-s001.pdf]

# Supplemental Digital Content (Appendix 1)

## Participation/Activity Questionnaire for people with Lower Limb Amputation

### GENERAL DATA

Date of survey :

Patient's Identification Number (ID) :

Last name :

First name :

Address :

Contact information (Tel/Cell. Number) :

### DEMOGRAPHIC DATA

Date of birth/age :

Gender: Female  Male

Dominant hand: Right  Left

### ANAMNESIS

Date of last amputation (or period):

Etiology (cause of amputation):

Bilateral: Yes  No

Amputation Side: Right  Left

Amputation Level: Trans-Femoral  Trans-Tibial  Other

Single Surgery: Yes  No

Other associated pathologies:

### SOCIAL DATA

Work activity before last amputation: Yes  No

Current work activity: Yes  No

Do you need help to carry out your daily activities (personal hygiene, dressing, etc)?

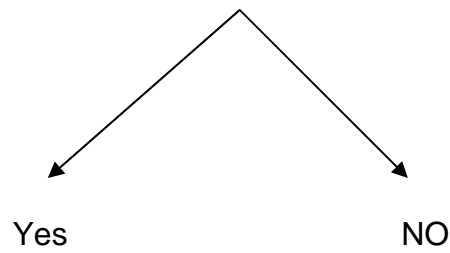

How much assistance do you need?      Maximum   
                                                                                         Moderate   
                                                                                         Consistent

Do you also need assistance out of home?    Yes       No

If yes, please choose one of the items. Only supervision       Constant assistance

Do you walk?      Yes       No

Are you able to walk indoor?     

Are you able to walk outdoor?     

With assistance?     

Without assistance?     

Do you feel pain at the amp. limb?      Yes       No

Which kind of pain?

Phantom Limb Pain     

Stump Pain
